# Supplementary material for: Deciphering Genomic Regions and Putative Candidate Genes for Grain Size and Shape Traits in Durum Wheat through GWAS
Source: Preprints.org preprint supplement (doi:10.20944/preprints202308.1643.v1), 2023-08-23
Supplement: Supplementary file 1 [file Figure legends.docx]

**FIGURE LEGENDS**

**Figure 1.** Eigenvector principal component plot and its 3D demonstration

**Figure 2**. Kinship plot of panel. The heat map of the kinship matrix demonstrates the relationship between genotypes

**Figure 3.** LD decay plot using the physical position of SNP markers at an *r2* value of 0.1. LD decay drop point was 3,601,053 bp in the whole durum wheat genome

**Figure 4.** Manhattan and QQ plots of GWAS analyses. Markers that exceeded the *FDR-adjusted p*-values are marker-trait associations (MTAs). Stable MTAs are indicated by vertical lines connecting overlapping markers. Marker names are illustrated in the plots.

**Figure S1.** Distribution plots of grain size and shape-related traits of the durum panel in two environments and BLUP data

**Figure S2.** Created LD blocks for stable MTAs. The markers and blocks for each MTA (some located on the same marker) are shown in yellow. The MTAs are also shown on their own markers.
