# Supplementary material for: Deciphering Genomic Regions and Putative Candidate Genes for Grain Size and Shape Traits in Durum Wheat through GWAS
Source: Preprints.org preprint supplement (doi:10.20944/preprints202308.1643.v1), 2023-08-23
Supplement: Supplementary file 2 [file Table S1.xlsx]

## Sheet: Table S1
Table S1: The pedigree information of each genotype in the durum panel
No	Code	Species	Cross
1	DWAM1	Triticum durum	PLATA_7/ILBOR_1//SOMAT_3/3/CABECA_2/PATKA_4//ZHONG ZUO/2*GREEN_3
2	DWAM2	Triticum durum	PLATA_10/6/MQUE/4/USDA573//QFN/AA_7/3/ALBA-D/5/AVO/HUI/7/PLATA_13/8/THKNEE_11/9/CHEN/ALTAR 84/3/HUI/POC//BUB/RUFO/4/FNFOOT/10/GREEN_32/CHEN_7//SILVER_14/3/DIPPER_2/BUSHEN_3/4/SNITAN
3	DWAM3	Triticum durum	PLATA_10/6/MQUE/4/USDA573//QFN/AA_7/3/ALBA-D/5/AVO/HUI/7/PLATA_13/8/RAFI97/9/MALMUK_1/SERRATOR_1/10/ARMENT//SRN_3/NIGRIS_4/3/CANELO_9.1/11/SHAG_21/DIPPER_2//PATA_2/6/ARAM_7//CREX/ALLA/5/ENTE/MEXI_2//HUI/4/YAV_1/3/LD357E/2*TC60//JO69
4	DWAM4	Triticum durum	EUDO//CHEN_1/TEZ/3/TANTLO_1/4/SNITAN/5/SOMAT_4/INTER_8
5	DWAM5	Triticum durum	YAZI_1/AKAKI_4//SOMAT_3/3/AUK/GUIL//GREEN/4/VRKS_3/3/AJAIA_12/F3LOCAL(SEL.ETHIO.135.85)//PLATA_13/5/PLAYERO
6	DWAM6	Triticum durum	CNDO/PRIMADUR//HAI-OU_17/3/SNITAN/4/PLATA_7/ILBOR_1//SOMAT_3/5/HESSIAN-F_2/3/STOT//ALTAR 84/ALD
7	DWAM7	Triticum durum	WID22241/4/ARMENT//SRN_3/NIGRIS_4/3/CANELO_9.1/5/TARRO_1/2*YUAN_1//AJAIA_13/YAZI/3/SOMAT_4/INTER_8/4/ARMENT//SRN_3/NIGRIS_4/3/CANELO_9.1
8	DWAM8	Triticum durum	KOFA/4/ACUATICO_1/RASCON_33//ACUATICO_1/3/ARAM/BOOMER/5/ARMENT//SRN_3/NIGRIS_4/3/CANELO_9.1
9	DWAM9	Triticum durum	CLAUDIO/4/YAZI_1/AKAKI_4//SOMAT_3/3/AUK/GUIL//GREEN/10/TARRO_1/2*YUAN_1//AJAIA_13/YAZI/9/USDA595/3/D67.3/RABI//CRA/4/ALO/5/HUI/YAV_1/6/ARDENTE/7/HUI/YAV79/8/POD_9
10	DWAM10	Triticum durum	ADAMAR_15//ALBIA_1/ALTAR 84/3/SNITAN/4/SOMAT_4/INTER_8/5/SOOTY_9/RASCON_37/6/BICHENA/AKAKI_7/4/LIS_8/FILLO_6/3/FUUT//HORA/JOR/5/YAZI_1/AKAKI_4//SOMAT_3/3/AUK/GUIL//GREEN
11	DWAM11	Triticum durum	NASSIRA/4/DUKEM_1//PATKA_7/YAZI_1/3/PATKA_7/YAZI_1
12	DWAM12	Triticum durum	VANRRIKSE_6.2//1A-1D 2+12-5/3*WB881/3/COSMODUR/5/SOMAT_4/SILVER_1/3/FOCHA_1/ALAS//4*FOCHA_1/4/SOMAT_3/PHAX_1//TILO_1/LOTUS_4
13	DWAM13	Triticum durum	MERIDIANO/5/MINIMUS/COMB DUCK_2//CHAM_3/3/GREEN_19/4/SORA/2*PLATA_12//SOMAT_3/6/BCRIS/BICUM//LLARETA INIA/3/DUKEM_12/2*RASCON_21
14	DWAM14	Triticum durum	SARAGOYA/10/RCOL/THKNEE_2/9/USDA595/3/D67.3/RABI//CRA/4/ALO/5/HUI/YAV_1/6/ARDENTE/7/HUI/YAV79/8/POD_9/11/PLATA_6/GREEN_17//RCOL/3/RYPS27_3/SKARV_3
15	DWAM15	Triticum durum	SARAGOYA/11/BRAK_2/AJAIA_2//SOLGA_8/3/FOSKAL_1/PELA_2//BRAK_2/10/PLATA_10/6/MQUE/4/USDA573//QFN/AA_7/3/ALBA-D/5/AVO/HUI/7/PLATA_13/8/THKNEE_11/9/CHEN/ALTAR 84/3/HUI/POC//BUB/RUFO/4/FNFOOT/12/SNITAN/4/ARMENT//SRN_3/NIGRIS_4/3/CANELO_9.1/5/SNITAN
16	DWAM16	Triticum durum	SARAGOYA/4/GRO_2/YUAN_1//ARLIN/2*ACO89/3/JUPARE C 2001/5/SOMAT_4/INTER_8/3/RASCON_21/KNAR_3//PLATA_8/4/CNDO/PRIMADUR//HAI-OU_17/3/SNITAN
17	DWAM17	Triticum durum	SOOTY_9/RASCON_37//STORLOM/5/SOMAT_4/SILVER_1/3/FOCHA_1/ALAS//4*FOCHA_1/4/SOMAT_3/PHAX_1//TILO_1/LOTUS_4
18	DWAM18	Triticum durum	SOOTY_9/RASCON_37//GUAYACAN INIA/11/BOOMER_33/ZAR/3/BRAK_2/AJAIA_2//SOLGA_8/10/PLATA_10/6/MQUE/4/USDA573//QFN/AA_7/3/ALBA-D/5/AVO/HUI/7/PLATA_13/8/THKNEE_11/9/CHEN/ALTAR 84/3/HUI/POC//BUB/RUFO/4/FNFOOT
19	DWAM19	Triticum durum	SNITAN*2/RBC/5/SULA/AAZ_5//CHEN/ALTAR 84/3/AJAIA_12/F3LOCAL(SEL.ETHIO.135.85)//PLATA_13/4/ARMENT//SRN_3/NIGRIS_4/3/CANELO_9.1/6/PLATA_6/GREEN_17/3/CHEN/AUK//BISU/5/PLATA_3//CREX/ALLA/3/SOMBRA_20/4/SILVER_14/MOEWE
20	DWAM20	Triticum durum	JUPARE C 2001*2/IM/4/AAZ/MORUS_1//RCOL/3/SOMAT_3/PHAX_1//TILO_1/LOTUS_4/5/HYDRANASSA30/SILVER_5//LYMNO_8/3/PATKA_7/YAZI_1/4/YAZI_1/AKAKI_4//SOMAT_3/3/AUK/GUIL//GREEN
21	DWAM21	Triticum durum	JUPARE C 2001*2/IM/6/ADAMAR_15//ALBIA_1/ALTAR 84/3/SNITAN/4/SOMAT_4/INTER_8/5/SOOTY_9/RASCON_37/7/GUAYACAN INIA/KUCUK/4/ARMENT//SRN_3/NIGRIS_4/3/CANELO_9.1
22	DWAM22	Triticum durum	Unknown
23	DWAM23	Triticum durum	SOOTY_9/RASCON_37//SOMAT_3.1/5/GUAYACAN INIA/KUCUK/4/ARMENT//SRN_3/NIGRIS_4/3/CANELO_9.1/8/AVTA/ALTAR 84/5/CHEN/ALTAR 84/3/HUI/POC//BUB/RUFO/4/FNFOOT/6/SORA/2*PLATA_12//SOMAT_3/7/SOOTY_9/RASCON_37
24	DWAM24	Triticum durum	SOOTY_9/RASCON_37//JUPARE C 2001/5/THKNEE_11/SNITAN/4/YAZI_1/AKAKI_4//SOMAT_3/3/AUK/GUIL//GREEN/8/GREEN_2/HIMAN_12//SHIP_1/7/ECO/CMH76A.722//BIT/3/ALTAR 84/4/AJAIA_2/5/KJOVE_1/6/MALMUK_1/SERRATOR_1
25	DWAM25	Triticum durum	SOOTY_9/RASCON_37//SOMAT_3.1/3/SOOTY_9/RASCON_37//STORLOM/4/SOOTY_9/RASCON_37//GUAYACAN INIA/3/SOOTY_9/RASCON_37//LLARETA INIA
26	DWAM26	Triticum durum	ZHONG ZUO/2*GREEN_3//SORA/2*PLATA_12/10/PLATA_10/6/MQUE/4/USDA573//QFN/AA_7/3/ALBA-D/5/AVO/HUI/7/PLATA_13/8/THKNEE_11/9/CHEN/ALTAR 84/3/HUI/POC//BUB/RUFO/4/FNFOOT/11/SORA/2*PLATA_12//SOMAT_3/3/AJAIA_12/F3LOCAL(SEL.ETHIO.135.85)//PLATA_13
27	DWAM27	Triticum durum	ZHONG ZUO/2*GREEN_3//SORA/2*PLATA_12/10/PLATA_10/6/MQUE/4/USDA573//QFN/AA_7/3/ALBA-D/5/AVO/HUI/7/PLATA_13/8/THKNEE_11/9/CHEN/ALTAR 84/3/HUI/POC//BUB/RUFO/4/FNFOOT/11/RISSA/GAN//POHO_1/3/PLATA_3//CREX/ALLA/4/JUPARE C 2001/5/ARMENT//SRN_3/NIGRIS_4/3/CA
28	DWAM28	Triticum durum	LABUD/NIGRIS_3//GAN/3/AJAIA_13/YAZI/10/PLATA_10/6/MQUE/4/USDA573//QFN/AA_7/3/ALBA-D/5/AVO/HUI/7/PLATA_13/8/THKNEE_11/9/CHEN/ALTAR 84/3/HUI/POC//BUB/RUFO/4/FNFOOT/11/SOMAT_4/SILVER_1/3/FOCHA_1/ALAS//4*FOCHA_1/4/SOMAT_3/PHAX_1//TILO_1/LOTUS_4
29	DWAM29	Triticum durum	BCRIS/BICUM//LLARETA INIA/3/DUKEM_12/2*RASCON_21/4/SORA/2*PLATA_12//SOMAT_3/3/AJAIA_12/F3LOCAL(SEL.ETHIO.135.85)//PLATA_13
30	DWAM30	Triticum durum	MÂALI/6/MUSK_1//ACO89/FNFOOT_2/4/MUSK_4/3/PLATA_3//CREX/ALLA/5/OLUS*2/ILBOR//PATKA_7/YAZI_1/10/ALTAR 84//FD8419-126-1-2/RAZZAK/3/KRF-DW/BALADIA HAMRA/9/ALTAR 84/860137//YAZI_1/4/LIS_8/FILLO_6/3/FUUT//HORA/JOR/8/GEDIZ/FGO//GTA/3/SRN_1/4/TOTUS/5/ENTE/M
31	DWAM31	Triticum durum	TOPDUR/SAAT_923020.2/3/VANRRIKSE_6.2//1A-1D 2+12-5/3*WB881/4/SOOTY_9/RASCON_37//GUAYACAN INIA
32	DWAM32	Triticum durum	CHEN_1/TEZ/3/GUIL//CIT71/CII/4/SORA/PLATA_12/5/STOT//ALTAR 84/ALD/6/SOMAT_3/PHAX_1//TILO_1/LOTUS_4/7/LABUD/NIGRIS_3//GAN/3/AJAIA_13/YAZI/4/SORA/2*PLATA_12//SOMAT_3
33	DWAM33	Triticum durum	1A.1D 5+1-06/3*MOJO//RCOL/4/ARMENT//SRN_3/NIGRIS_4/3/CANELO_9.1/11/SOOTY_9/RASCON_37/3/SOOTY_9/TARRO_1//AJAIA_2/10/PLATA_10/6/MQUE/4/USDA573//QFN/AA_7/3/ALBA-D/5/AVO/HUI/7/PLATA_13/8/THKNEE_11/9/CHEN/ALTAR 84/3/HUI/POC//BUB/RUFO/4/FNFOOT
34	DWAM34	Triticum durum	SOMAT_4/INTER_8/5/AJAIA_16//HORA/JRO/3/GAN/4/ZAR/9/GEDIZ/FGO//GTA/3/SRN_1/4/TOTUS/5/ENTE/MEXI_2//HUI/4/YAV_1/3/LD357E/2*TC60//JO69/6/SOMBRA_20/7/JUPARE C 2001/8/CS/TH.CU//GLEN/3/GEN/4/MYNA/VUL/5/2*DON87/6/2*BUSCA_3
35	DWAM35	Triticum durum	RANCO//CIT71/CII/3/COMDK/4/TCHO//SHWA/MALD/3/CREX/5/SNITAN/6/YAZI_1/AKAKI_4//SOMAT_3/3/AUK/GUIL//GREEN
36	DWAM36	Triticum durum	MOHAWK/6/LOTUS_5/F3LOCAL(SEL.ETHIO.135.85)/5/CHEN/ALTAR 84/3/HUI/POC//BUB/RUFO/4/FNFOOT
37	DWAM37	Triticum durum	Unknown
38	DWAM38	Triticum durum	Unknown
39	DWAM39	Triticum durum	GUANAY/3/FULVOUS_1/MFOWL_13//JUPARE C 2001/8/R143/RUFF//STIL/3/YAV79/4/SHWA/MALD/5/ALTAR 84/6/TILO_1/LOTUS_4/7/YAZI_1/AKAKI_4//SOMAT_3/3/AUK/GUIL//GREEN
40	DWAM40	Triticum durum	ZENIT/5/SORA/2*PLATA_12//RASCON_37/4/ARMENT//SRN_3/NIGRIS_4/3/CANELO_9.1/6/MINIMUS_4/GRO_2/3/PROZANA/ARLIN//MUSK_6/5/SULA/RBCE_2/3/HUI//CIT71/CII/4/RYPS27_3/SKARV_3
41	DWAM41	Triticum durum	PRECO/6/AJAIA_12/F3LOCAL(SEL.ETHIO.135.85)//PLATA_13/3/POD_9/4/RASCON_37/TARRO_2//RASCON_37/5/ARMENT//SRN_3/NIGRIS_4/3/CANELO_9.1/7/1A.1D 5+1-06/3*MOJO//RCOL/4/ARMENT//SRN_3/NIGRIS_4/3/CANELO_9.1
42	DWAM42	Triticum durum	SOMAT_4/INTER_8/5/CREX//BOY/YAV_1/3/PLATA_6/4/PORRON_11/6/MINIMUS_6/PLATA_16//IMMER/3/SORA/2*PLATA_12/7/RASCON_22/RASCON_21//MOJO_2/3/GUANAY/4/RCOL/5/SORA/2*PLATA_12//SOMAT_3
43	DWAM43	Triticum durum	KIRKI_1/HIMAN_9/4/LIS_8/FILLO_6/3/FUUT//HORA/JOR/5/ARMENT//SRN_3/NIGRIS_4/3/CANELO_9.1/6/ADAMAR_15//ALBIA_1/ALTAR 84/3/SNITAN/4/SOMAT_4/INTER_8/5/SOOTY_9/RASCON_37/7/1A.1D 5+1-06/3*MOJO//RCOL/4/ARMENT//SRN_3/NIGRIS_4/3/CANELO_9.1
44	DWAM44	Triticum durum	MÂALI/5/LOTUS_5/SORD_1/3/CANELO_8//SORA/2*PLATA_12/4/YAZI_1/AKAKI_4//SOMAT_3/3/AUK/GUIL//GREEN
45	DWAM45	Triticum durum	BELLAROI/6/RASCON_22/RASCON_21//MOJO_2/3/GUANAY/4/RCOL/5/SORA/2*PLATA_12//SOMAT_3/8/PLATA_3//CREX/ALLA/3/YAZI_10/4/JUPARE C 2001/7/CHEN_11/POC//TANTLO/5/ENTE/MEXI_2//HUI/4/YAV_1/3/LD357E/2*TC60//JO69/6/MINIMUS/COMB DUCK_2//CHAM_3
46	DWAM46	Triticum durum	1A.1D 5+1-06/3*MOJO//RCOL/4/ARMENT//SRN_3/NIGRIS_4/3/CANELO_9.1/11/SOOTY_9/RASCON_37/3/SOOTY_9/TARRO_1//AJAIA_2/10/PLATA_10/6/MQUE/4/USDA573//QFN/AA_7/3/ALBA-D/5/AVO/HUI/7/PLATA_13/8/THKNEE_11/9/CHEN/ALTAR 84/3/HUI/POC//BUB/RUFO/4/FNFOOT
47	DWAM47	Triticum durum	SOMAT_4/INTER_8/3/RASCON_21/KNAR_3//PLATA_8/4/CNDO/PRIMADUR//HAI-OU_17/3/SNITAN/9/GEDIZ/FGO//GTA/3/SRN_1/4/TOTUS/5/ENTE/MEXI_2//HUI/4/YAV_1/3/LD357E/2*TC60//JO69/6/SOMBRA_20/7/JUPARE C 2001/8/CS/TH.CU//GLEN/3/GEN/4/MYNA/VUL/5/2*DON87/6/2*BUSCA_3
48	DWAM48	Triticum durum	Unknown
49	DWAM49	Triticum durum	Unknown
50	DWAM50	Triticum durum	Unknown
51	DWAM52	Triticum durum	Unknown
52	DWAM53	Triticum durum	Unknown
53	DWAM54	Triticum durum	Unknown
54	DWAM55	Triticum durum	Unknown
55	DWAM57	Triticum durum	Unknown
56	DWAM58	Triticum durum	Unknown
57	DWAM59	Triticum durum	Unknown
58	DWAM60	Triticum durum	Unknown
59	DWAM61	Triticum durum	CEMEXI C 2008/5/GUAYACAN INIA/POMA_2//SNITAN/4/D86135/ACO89//PORRON_4/3/SNITAN
60	DWAM62	Triticum durum	BRENNUR/CIRNO C 2008
61	DWAM63	Triticum durum	BRENNUR/CIRNO C 2008
62	DWAM64	Triticum durum	DAKTER/5/GUAYACAN INIA/POMA_2//SNITAN/4/D86135/ACO89//PORRON_4/3/SNITAN
63	DWAM65	Triticum durum	D95223/7/ALTAR 84/BINTEPE 85/3/STOT//ALTAR 84/ALD/4/POD_11/YAZI_1/5/VANRRIKSE_12/SNITAN/6/SOOTY_9/RASCON_37//WODUCK/CHAM_3
64	DWAM66	Triticum durum	GEROMTEL-3/5/GUAYACAN INIA/POMA_2//SNITAN/4/D86135/ACO89//PORRON_4/3/SNITAN
65	DWAM67	Triticum durum	GERUFTEL-1//GUAYACAN INIA/2*SNITAN
66	DWAM68	Triticum durum	GERUFTEL-1/6/SOMAT_3/PHAX_1//TILO_1/LOTUS_4/3/GUANAY/5/NETTA_4/DUKEM_12//RASCON_19/3/SORA/2*PLATA_12/4/GREEN_18/FOCHA_1//AIRON_1
67	DWAM69	Triticum durum	TUNSYR-2//GUAYACAN INIA/2*SNITAN
68	DWAM70	Triticum durum	TUNSYR-2/6/ALTAR 84/STINT//SILVER_45/3/GUANAY/4/GREEN_14//YAV_10/AUK/5/SOMAT_4/INTER_8
69	DWAM72	Triticum durum	TUNSYR-2/6/ALTAR 84/STINT//SILVER_45/3/GUANAY/4/GREEN_14//YAV_10/AUK/5/SOMAT_4/INTER_8
70	DWAM73	Triticum durum	CBC 509 CHILE/5/2*AJAIA_16//HORA/JRO/3/GAN/4/ZAR/6/BCRIS/BICUM//LLARETA INIA/3/DUKEM_12/2*RASCON_21/9/GUAYACAN INIA/GUANAY/8/GEDIZ/FGO//GTA/3/SRN_1/4/TOTUS/5/ENTE/MEXI_2//HUI/4/YAV_1/3/LD357E/2*TC60//JO69/6/SOMBRA_20/7/JUPARE C 2001
71	DWAM74	Triticum durum	CBC 509 CHILE/6/ECO/CMH76A.722//BIT/3/ALTAR 84/4/AJAIA_2/5/KJOVE_1/7/AJAIA_12/F3LOCAL(SEL.ETHIO.135.85)//PLATA_13/8/SOOTY_9/RASCON_37//WODUCK/CHAM_3/9/SOOTY_9/RASCON_37//WODUCK/CHAM_3/3/SOMAT_3/PHAX_1//TILO_1/LOTUS_4/10/GUAYACAN INIA/2*SNITAN
72	DWAM76	Triticum durum	SOOTY_9/RASCON_37//GUAYACAN INIA/4/BCRIS/BICUM//LLARETA INIA/3/DUKEM_12/2*RASCON_21/9/CBC 509 CHILE/6/ECO/CMH76A.722//BIT/3/ALTAR 84/4/AJAIA_2/5/KJOVE_1/7/AJAIA_12/F3LOCAL(SEL.ETHIO.135.85)//PLATA_13/8/SOOTY_9/RASCON_37//WODUCK/CHAM_3
73	DWAM77	Triticum durum	SOOTY_9/RASCON_37//GUAYACAN INIA/4/SOOTY_9/RASCON_37//WODUCK/CHAM_3/3/SOMAT_3/PHAX_1//TILO_1/LOTUS_4/7/ALBIA_1/ALTAR 84//YAZI_1/4/CREX//BOY/YAV_1/3/PLATA_6/5/SOMAT_4/INTER_8/6/LIRO_2/CANELO_9
74	DWAM78	Triticum durum	GUAYACAN INIA/2*SNITAN/6/CANELO_8//SORA/2*PLATA_12/4/STORLOM/3/RASCON_37/TARRO_2//RASCON_37/5/TECA96/TILO_1/7/GUAYACAN INIA/POMA_2//SNITAN/4/D86135/ACO89//PORRON_4/3/SNITAN
75	DWAM79	Triticum durum	GUAYACAN INIA/GUANAY//PORRON_4/BEJAH_7/3/VANRRIKSE_12/SNITAN/7/MOHAWK/6/RASCON_37/2*TARRO_2/4/ROK/FGO//STIL/3/BISU_1/5/MALMUK_1/SERRATOR_1/8/STOT//ALTAR 84/ALD/3/THB/CEP7780//2*MUSK_4/6/ECO/CMH76A.722//BIT/3/ALTAR 84/4/AJAIA_2/5/KJOVE_1/7/RASCON_37/2
76	DWAM80	Triticum durum	GUAYACAN INIA/POMA_2//SNITAN/4/D86135/ACO89//PORRON_4/3/SNITAN/5/SHEWA 28/GDO//ZHONG ZUO/2*GREEN_3/3/BOOMER_18/LOTUS_4/4/ARMENT//SRN_3/NIGRIS_4/3/CANELO_9.1/7/ALTAR 84/BINTEPE 85/3/STOT//ALTAR 84/ALD/4/POD_11/YAZI_1/5/VANRRIKSE_12/SNITAN/6/SOOTY_9/RA
77	DWAM81	Triticum durum	GUAYACAN INIA/GUANAY/8/GEDIZ/FGO//GTA/3/SRN_1/4/TOTUS/5/ENTE/MEXI_2//HUI/4/YAV_1/3/LD357E/2*TC60//JO69/6/SOMBRA_20/7/JUPARE C 2001/9/MOHAWK/6/RASCON_37/2*TARRO_2/4/ROK/FGO//STIL/3/BISU_1/5/MALMUK_1/SERRATOR_1/10/CBC 509 CHILE/6/ECO/CMH76A.722//BIT/3/
78	DWAM82	Triticum durum	CAMAYO//HYDRANASSA30/SILVER_5/3/SOOTY_9/RASCON_37/5/DUKEM_15/3/BISU_1/PLATA_16//RISSA/4/SOOTY_9/RASCON_37/6/SOOTY_9/RASCON_37//TILO_1/LOTUS_4/7/BCRIS/BICUM//LLARETA INIA/3/DUKEM_12/2*RASCON_21/8/STOT//ALTAR 84/ALD/3/THB/CEP7780//2*MUSK_4/6/ECO/CMH76A
79	DWAM83	Triticum durum	CNDO/VEE//PLATA_8/3/6*PLATA_11/6/PLATA_8/4/GARZA/AFN//CRA/3/GTA/5/RASCON/9/USDA595/3/D67.3/RABI//CRA/4/ALO/5/HUI/YAV_1/6/ARDENTE/7/HUI/YAV79/8/POD_9/10/ALTAR 84/BINTEPE 85/3/STOT//ALTAR 84/ALD/4/POD_11/YAZI_1/5/VANRRIKSE_12/SNITAN/6/SOOTY_9/RASCON_37
80	DWAM85	Triticum durum	RANCO//CIT71/CII/3/COMDK/4/TCHO//SHWA/MALD/3/CREX/5/SNITAN/6/YAZI_1/AKAKI_4//SOMAT_3/3/AUK/GUIL//GREEN/9/CBC 509 CHILE/6/ECO/CMH76A.722//BIT/3/ALTAR 84/4/AJAIA_2/5/KJOVE_1/7/AJAIA_12/F3LOCAL(SEL.ETHIO.135.85)//PLATA_13/8/SOOTY_9/RASCON_37//WODUCK/CHA
81	DWAM86	Triticum durum	SILK_3/DIPPER_6/3/ACO89/DUKEM_4//5*ACO89/4/PLATA_7/ILBOR_1//SOMAT_3/7/SNITAN/5/AJAIA_12/F3LOCAL(SEL.ETHIO.135.85)//PLATA_13/3/SOMAT_3/4/SOOTY_9/RASCON_37/6/SNITAN/8/SINCHI/3/PF70354/ALD//MES/4/PATKA_7/YAZI_1/5/4*PATKA_7/YAZI_1
82	DWAM87	Triticum durum	1A.1D 5+1-06/3*MOJO//RCOL/4/ARMENT//SRN_3/NIGRIS_4/3/CANELO_9.1/11/SOOTY_9/RASCON_37//WODUCK/CHAM_3/10/PLATA_10/6/MQUE/4/USDA573//QFN/AA_7/3/ALBA-D/5/AVO/HUI/7/PLATA_13/8/THKNEE_11/9/CHEN/ALTAR 84/3/HUI/POC//BUB/RUFO/4/FNFOOT/12/ALTAR 84/STINT//SILVE
83	DWAM88	Triticum durum	TARRO_1/2*YUAN_1//AJAIA_13/YAZI/3/SOMAT_3/PHAX_1//TILO_1/LOTUS_4/4/CANELO_8//SORA/2*PLATA_12/7/CMH83.2578/4/D88059//WARD/YAV79/3/ACO89/5/2*SOOTY_9/RASCON_37/6/1A.1D 5+1-06/3*MOJO/3/AJAIA_12/F3LOCAL(SEL.ETHIO.135.85)//PLATA_13/8/AJAIA/LOTUS_4/3/SOMAT_
84	DWAM89	Triticum durum	GUAYACAN INIA/2*SNITAN/5/CMH85.797//CADO/BOOMER_33/4/ARMENT//SRN_3/NIGRIS_4/3/CANELO_9.1/10/SWAHEN_2/KIRKI_8//PROZANA_1/4/ADAMAR_15//ALBIA_1/ALTAR 84/3/SNITAN/9/GUAYACAN INIA/GUANAY/8/GEDIZ/FGO//GTA/3/SRN_1/4/TOTUS/5/ENTE/MEXI_2//HUI/4/YAV_1/3/LD357E
85	DWAM90	Triticum durum	GUAYACAN INIA/2*SNITAN/4/CMH83.2926//BOOMER_18/LOTUS_4/3/SOMAT_4/INTER_8/9/CBC 509 CHILE/6/ECO/CMH76A.722//BIT/3/ALTAR 84/4/AJAIA_2/5/KJOVE_1/7/AJAIA_12/F3LOCAL(SEL.ETHIO.135.85)//PLATA_13/8/SOOTY_9/RASCON_37//WODUCK/CHAM_3
86	DWAM91	Triticum durum	CANELO_8//SORA/2*PLATA_12/4/STORLOM/3/RASCON_37/TARRO_2//RASCON_37/5/TECA96/TILO_1/6/SORA/2*PLATA_12/3/SORA/2*PLATA_12//SOMAT_3/4/AJAIA_13/YAZI//DIPPER_2/BUSHEN_3/7/ALTAR 84/BINTEPE 85/3/STOT//ALTAR 84/ALD/4/POD_11/YAZI_1/5/VANRRIKSE_12/SNITAN/6/SOOT
87	DWAM92	Triticum durum	SOMAT_3/PHAX_1//TILO_1/LOTUS_4/3/GUANAY/5/NETTA_4/DUKEM_12//RASCON_19/3/SORA/2*PLATA_12/4/GREEN_18/FOCHA_1//AIRON_1/6/STORLOM/3/RASCON_37/TARRO_2//RASCON_37/4/D00003A/7/GUAYACAN INIA/2*SNITAN
88	DWAM93	Triticum durum	BD98082/CIRNO C 2008/5/00D1065/4/GUAYACAN INIA/GUANAY//PORRON_4/BEJAH_7/3/VANRRIKSE_12/SNITAN
89	DWAM94	Triticum durum	BD96021.25/10/CNDO/VEE//CELTA/3/PATA_2/6/ARAM_7//CREX/ALLA/5/ENTE/MEXI_2//HUI/4/YAV_1/3/LD357E/2*TC60//JO69/9/USDA595/3/D67.3/RABI//CRA/4/ALO/5/HUI/YAV_1/6/ARDENTE/7/HUI/YAV79/8/POD_9/11/GUAYACAN INIA/2*SNITAN
90	DWAM95	Triticum durum	BYBLOS/6/TOPDY_18/FOCHA_1//ALTAR 84/3/AJAIA_12/F3LOCAL(SEL.ETHIO.135.85)//PLATA_13/4/SOMAT_3/GREEN_22/5/VRKS_3/3/AJAIA_12/F3LOCAL(SEL.ETHIO.135.85)//PLATA_13/7/GUAYACAN INIA/GUANAY//PORRON_4/BEJAH_7/3/VANRRIKSE_12/SNITAN
91	DWAM96	Triticum durum	BYBLOS/4/CMH83.2926//BOOMER_18/LOTUS_4/3/SOMAT_4/INTER_8/9/GUAYACAN INIA/GUANAY/8/GEDIZ/FGO//GTA/3/SRN_1/4/TOTUS/5/ENTE/MEXI_2//HUI/4/YAV_1/3/LD357E/2*TC60//JO69/6/SOMBRA_20/7/JUPARE C 2001
92	DWAM97	Triticum durum	BYBLOS/5/STORLOM/3/RASCON_37/TARRO_2//RASCON_37/4/D00003A/6/CIRNO C 2008
93	DWAM99	Triticum durum	MIRADOUX/3/AG 1-22/2*ACO89//2*UC1113/4/CIRNO C 2008
94	DWAM101	Triticum durum	BD99079.21.2/9/GUAYACAN INIA/GUANAY/8/GEDIZ/FGO//GTA/3/SRN_1/4/TOTUS/5/ENTE/MEXI_2//HUI/4/YAV_1/3/LD357E/2*TC60//JO69/6/SOMBRA_20/7/JUPARE C 2001/10/SOMAT_3/PHAX_1//TILO_1/LOTUS_4/3/GUANAY/5/NETTA_4/DUKEM_12//RASCON_19/3/SORA/2*PLATA_12/4/GREEN_18/FO
95	DWAM102	Triticum durum	GEDIZ/FGO//GTA/3/SRN_1/4/TOTUS/5/ENTE/MEXI_2//HUI/4/YAV_1/3/LD357E/2*TC60//JO69/6/SOMBRA_20/7/JUPARE C 2001/8/SOMAT_3/PHAX_1//TILO_1/LOTUS_4/9/SOOTY_9/RASCON_37//WODUCK/CHAM_3/10/BICHENA/AKAKI_7/3/SOMAT_3/PHAX_1//TILO_1/LOTUS_4/7/CHEN_11/POC//TANTLO/
96	DWAM103	Triticum durum	PLATA_10/6/MQUE/4/USDA573//QFN/AA_7/3/ALBA-D/5/AVO/HUI/7/PLATA_13/8/RAFI97/9/MALMUK_1/SERRATOR_1/10/ARMENT//SRN_3/NIGRIS_4/3/CANELO_9.1/11/SHAG_21/DIPPER_2//PATA_2/6/ARAM_7//CREX/ALLA/5/ENTE/MEXI_2//HUI/4/YAV_1/3/LD357E/2*TC60//JO69/12/CNDO/VEE//PLAT
97	DWAM104	Triticum durum	KOFA/4/DUKEM_1//PATKA_7/YAZI_1/3/PATKA_7/YAZI_1/10/CHEN_1/TEZ/3/GUIL//CIT71/CII/4/SORA/PLATA_12/5/STOT//ALTAR 84/ALD/9/USDA595/3/D67.3/RABI//CRA/4/ALO/5/HUI/YAV_1/6/ARDENTE/7/HUI/YAV79/8/POD_9
98	DWAM105	Triticum durum	C F4 20 S/4/YAZI_1/AKAKI_4//SOMAT_3/3/AUK/GUIL//GREEN/5/CANELO_9.1//SHAKE_3/2*AJAIA_2/10/KOFA/9/USDA595/3/D67.3/RABI//CRA/4/ALO/5/HUI/YAV_1/6/ARDENTE/7/HUI/YAV79/8/POD_9
99	DWAM106	Triticum durum	C F4 20 S/4/YAZI_1/AKAKI_4//SOMAT_3/3/AUK/GUIL//GREEN/5/CANELO_9.1//SHAKE_3/2*AJAIA_2/12/MOHAWK/10/PLATA_10/6/MQUE/4/USDA573//QFN/AA_7/3/ALBA-D/5/AVO/HUI/7/PLATA_13/8/THKNEE_11/9/CHEN/ALTAR 84/3/HUI/POC//BUB/RUFO/4/FNFOOT/11/ARMENT//SRN_3/NIGRIS_4/3/
100	DWAM107	Triticum durum	MOHAWK/4/DUKEM_1//PATKA_7/YAZI_1/3/PATKA_7/YAZI_1/5/KOFA/4/DUKEM_1//PATKA_7/YAZI_1/3/PATKA_7/YAZI_1/6/C F4 20 S/4/YAZI_1/AKAKI_4//SOMAT_3/3/AUK/GUIL//GREEN/5/CANELO_9.1//SHAKE_3/2*AJAIA_2
101	DWAM108	Triticum durum	SNITAN*2/RBC/10/KOFA/9/USDA595/3/D67.3/RABI//CRA/4/ALO/5/HUI/YAV_1/6/ARDENTE/7/HUI/YAV79/8/POD_9
102	DWAM110	Triticum durum	MARJANA/5/MOHAWK/4/DUKEM_1//PATKA_7/YAZI_1/3/PATKA_7/YAZI_1
103	DWAM111	Triticum durum	CMH83.2578/4/D88059//WARD/YAV79/3/ACO89/5/2*SOOTY_9/RASCON_37/6/1A.1D 5+1-06/3*MOJO/3/AJAIA_12/F3LOCAL(SEL.ETHIO.135.85)//PLATA_13/12/MOHAWK/10/PLATA_10/6/MQUE/4/USDA573//QFN/AA_7/3/ALBA-D/5/AVO/HUI/7/PLATA_13/8/THKNEE_11/9/CHEN/ALTAR 84/3/HUI/POC//B
104	DWAM112	Triticum durum	C F4 20 S/4/YAZI_1/AKAKI_4//SOMAT_3/3/AUK/GUIL//GREEN/5/CANELO_9.1//SHAKE_3/2*AJAIA_2/6/MOHAWK/4/DUKEM_1//PATKA_7/YAZI_1/3/PATKA_7/YAZI_1
105	DWAM113	Triticum durum	STORLOM/3/RASCON_37/TARRO_2//RASCON_37/4/D00003A/5/1A.1D 5+1-06/3*MOJO/3/AJAIA_12/F3LOCAL(SEL.ETHIO.135.85)//PLATA_13/12/MOHAWK/10/PLATA_10/6/MQUE/4/USDA573//QFN/AA_7/3/ALBA-D/5/AVO/HUI/7/PLATA_13/8/THKNEE_11/9/CHEN/ALTAR 84/3/HUI/POC//BUB/RUFO/4/FNF
106	DWAM114	Triticum durum	KOFA/9/USDA595/3/D67.3/RABI//CRA/4/ALO/5/HUI/YAV_1/6/ARDENTE/7/HUI/YAV79/8/POD_9/10/MOHAWK/4/DUKEM_1//PATKA_7/YAZI_1/3/PATKA_7/YAZI_1
107	DWAM115	Triticum durum	KOFA/9/USDA595/3/D67.3/RABI//CRA/4/ALO/5/HUI/YAV_1/6/ARDENTE/7/HUI/YAV79/8/POD_9/10/INRAM_1805//SOMAT_4/INTER_8/3/SOOTY_9/RASCON_37//TILO_1/LOTUS_4
108	DWAM116	Triticum durum	MOHAWK/3/GUANAY//TILO_1/LOTUS_4/4/ARMENT//SRN_3/NIGRIS_4/3/CANELO_9.1/5/INRAM_1805//SOMAT_4/INTER_8/3/SOOTY_9/RASCON_37//TILO_1/LOTUS_4
109	DWAM117	Triticum durum	C F4 20 S/4/YAZI_1/AKAKI_4//SOMAT_3/3/AUK/GUIL//GREEN/5/CANELO_9.1//SHAKE_3/2*AJAIA_2/6/STORLOM/3/RASCON_37/TARRO_2//RASCON_37/4/D00003A/5/1A.1D 5+1-06/3*MOJO/3/AJAIA_12/F3LOCAL(SEL.ETHIO.135.85)//PLATA_13/10/KOFA/9/USDA595/3/D67.3/RABI//CRA/4/ALO/5/
110	DWAM118	Triticum durum	STORLOM/3/RASCON_37/TARRO_2//RASCON_37/4/D00003A/5/1A.1D 5+1-06/3*MOJO/3/AJAIA_12/F3LOCAL(SEL.ETHIO.135.85)//PLATA_13/12/MOHAWK/10/PLATA_10/6/MQUE/4/USDA573//QFN/AA_7/3/ALBA-D/5/AVO/HUI/7/PLATA_13/8/THKNEE_11/9/CHEN/ALTAR 84/3/HUI/POC//BUB/RUFO/4/FNF
111	DWAM120	Triticum durum	KOFA/9/USDA595/3/D67.3/RABI//CRA/4/ALO/5/HUI/YAV_1/6/ARDENTE/7/HUI/YAV79/8/POD_9/10/KRONOS/11/C F4 20 S/4/YAZI_1/AKAKI_4//SOMAT_3/3/AUK/GUIL//GREEN/5/CANELO_9.1//SHAKE_3/2*AJAIA_2
112	DWAM121	Triticum durum	USDA595/3/D67.3/RABI//CRA/4/ALO/5/HUI/YAV_1/6/ARDENTE/7/HUI/YAV79/8/POD_9/9/NASSIRA
113	DWAM122	Triticum durum	RISSA/GAN//POHO_1/3/PLATA_3//CREX/ALLA/11/CANELO_9.1/SNITAN/10/PLATA_10/6/MQUE/4/USDA573//QFN/AA_7/3/ALBA-D/5/AVO/HUI/7/PLATA_13/8/THKNEE_11/9/CHEN/ALTAR 84/3/HUI/POC//BUB/RUFO/4/FNFOOT/12/CBC 509 CHILE/SOMAT_3.1//BOOMER_18/LOTUS_4/11/SOOTY_9/RASCON_
114	DWAM123	Triticum durum	D95223/3/PIQUERO/KNIPA//AMIC/TAGUA
115	DWAM128	Triticum durum	PH896-21/5/HUBEI//SOOTY_9/RASCON_37/3/2*SOOTY_9/RASCON_37/4/SOOTY_9/RASCON_37/6/1A.1D 5+1-06/3*MOJO//RCOL/4/ARMENT//SRN_3/NIGRIS_4/3/CANELO_9.1
116	DWAM129	Triticum durum	PH896-21/5/BRAK_2/AJAIA_2//SOLGA_8/3/CANELO_8//SORA/2*PLATA_12/4/YAZI_1/AKAKI_4//SOMAT_3/3/AUK/GUIL//GREEN/6/HUBEI//SOOTY_9/RASCON_37/3/2*SOOTY_9/RASCON_37/4/SOOTY_9/RASCON_37
117	DWAM130	Triticum durum	BELLAROI/5/1A.1D 5+1-06/3*MOJO//RCOL/4/ARMENT//SRN_3/NIGRIS_4/3/CANELO_9.1
118	DWAM131	Triticum durum	WID22202/5/TOSKA_26/RASCON_37//SNITAN/4/ARMENT//SRN_3/NIGRIS_4/3/CANELO_9.1/6/SOMAT_3/GREEN_22/4/GODRIN/GUTROS//DUKEM/3/THKNEE_11
119	DWAM132	Triticum durum	PRECO/10/TARRO_1/2*YUAN_1//AJAIA_13/YAZI/9/USDA595/3/D67.3/RABI//CRA/4/ALO/5/HUI/YAV_1/6/ARDENTE/7/HUI/YAV79/8/POD_9/11/CNDO/PRIMADUR//HAI-OU_17/3/SNITAN/4/JUPARE C 2001/5/CNDO/PRIMADUR//HAI-OU_17/3/SNITAN
120	DWAM133	Triticum durum	SARAGOYA/10/RCOL/THKNEE_2/9/USDA595/3/D67.3/RABI//CRA/4/ALO/5/HUI/YAV_1/6/ARDENTE/7/HUI/YAV79/8/POD_9/11/PLATA_6/GREEN_17//RCOL/3/RYPS27_3/SKARV_3
121	DWAM134	Triticum durum	SOOTY_9/RASCON_37//SOMAT_3.1/4/GRO_2/YUAN_1//ARLIN/2*ACO89/3/JUPARE C 2001
122	DWAM135	Triticum durum	SOOTY_9/RASCON_37//STORLOM/5/SOMAT_4/SILVER_1/3/FOCHA_1/ALAS//4*FOCHA_1/4/SOMAT_3/PHAX_1//TILO_1/LOTUS_4
123	DWAM136	Triticum durum	SOOTY_9/RASCON_37//GUAYACAN INIA/11/BOOMER_33/ZAR/3/BRAK_2/AJAIA_2//SOLGA_8/10/PLATA_10/6/MQUE/4/USDA573//QFN/AA_7/3/ALBA-D/5/AVO/HUI/7/PLATA_13/8/THKNEE_11/9/CHEN/ALTAR 84/3/HUI/POC//BUB/RUFO/4/FNFOOT
124	DWAM137	Triticum durum	SOOTY_9/RASCON_37//JUPARE C 2001/3/SOOTY_9/RASCON_37//CAMAYO
125	DWAM139	Triticum durum	SOOTY_9/RASCON_37//JUPARE C 2001/3/SOOTY_9/RASCON_37//SOMAT_3.1
126	DWAM140	Triticum durum	P91.272.3.1/3*MEXI75//2*JUPARE C 2001/5/ARTICO/AJAIA_3//HUALITA/3/FULVOUS_1/MFOWL_13/4/TECA96/TILO_1/6/RISSA/GAN//POHO_1/3/PLATA_3//CREX/ALLA*2/4/ARMENT//SRN_3/NIGRIS_4/3/CANELO_9.1
127	DWAM141	Triticum durum	SOOTY_9/RASCON_37//STORLOM/5/TOSKA_26/RASCON_37//SNITAN/4/ARMENT//SRN_3/NIGRIS_4/3/CANELO_9.1/6/RISSA/GAN//POHO_1/3/PLATA_3//CREX/ALLA*2/4/ARMENT//SRN_3/NIGRIS_4/3/CANELO_9.1
128	DWAM142	Triticum durum	SOOTY_9/RASCON_37//JUPARE C 2001/5/THKNEE_11/SNITAN/4/YAZI_1/AKAKI_4//SOMAT_3/3/AUK/GUIL//GREEN/8/GREEN_2/HIMAN_12//SHIP_1/7/ECO/CMH76A.722//BIT/3/ALTAR 84/4/AJAIA_2/5/KJOVE_1/6/MALMUK_1/SERRATOR_1
129	DWAM143	Triticum durum	SOOTY_9/RASCON_37//SOMAT_3.1/3/SOOTY_9/RASCON_37//STORLOM/4/SOOTY_9/RASCON_37//GUAYACAN INIA/3/SOOTY_9/RASCON_37//LLARETA INIA
130	DWAM144	Triticum durum	SORA/2*PLATA_12//SOMAT_3/6/CHEN_1/TEZ/3/GUIL//CIT71/CII/4/SORA/PLATA_12/5/STOT//ALTAR 84/ALD/7/TECA96/TILO_1/8/GUAYACAN INIA//YUAN_1/GREEN_18/3/SOOTY_9/RASCON_37/5/DUKEM_15/3/BISU_1/PLATA_16//RISSA/4/SOOTY_9/RASCON_37
131	DWAM145	Triticum durum	PLATA_7/ILBOR_1//SOMAT_3/3/SORA/2*PLATA_12//SRN_3/NIGRIS_4/4/BCRIS/BICUM//LLARETA INIA/3/DUKEM_12/2*RASCON_21
132	DWAM146	Triticum durum	BCRIS/BICUM//LLARETA INIA/3/DUKEM_12/2*RASCON_21/5/1A.1D 5+1-06/3*MOJO//RCOL/4/ARMENT//SRN_3/NIGRIS_4/3/CANELO_9.1
133	DWAM147	Triticum durum	SOMAT_4/SILVER_1/4/STORLOM/3/RASCON_37/TARRO_2//RASCON_37/5/PATKA_4/PLATA_16/6/CNDO/PRIMADUR//HAI-OU_17/3/SNITAN/4/JUPARE C 2001/5/CNDO/PRIMADUR//HAI-OU_17/3/SNITAN
134	DWAM148	Triticum durum	BCRIS/BICUM//LLARETA INIA/3/DUKEM_12/2*RASCON_21/4/SORA/2*PLATA_12//SOMAT_3/3/AJAIA_12/F3LOCAL(SEL.ETHIO.135.85)//PLATA_13
135	DWAM149	Triticum durum	BCRIS/BICUM//LLARETA INIA/3/DUKEM_12/2*RASCON_21/5/RISSA/GAN//POHO_1/3/PLATA_3//CREX/ALLA*2/4/ARMENT//SRN_3/NIGRIS_4/3/CANELO_9.1
136	DWAM150	Triticum durum	1A.1D 5+1-06/3*MOJO//RCOL/4/ARMENT//SRN_3/NIGRIS_4/3/CANELO_9.1/11/PLATA_10/6/MQUE/4/USDA573//QFN/AA_7/3/ALBA-D/5/AVO/HUI/7/PLATA_13/8/RAFI97/9/MALMUK_1/SERRATOR_1/10/ARMENT//SRN_3/NIGRIS_4/3/CANELO_9.1
137	DWAM151	Triticum durum	HUBEI//SOOTY_9/RASCON_37/3/2*SOOTY_9/RASCON_37/4/SOOTY_9/RASCON_37/6/OSU-3880005/3/STOT//ALTAR 84/ALD/4/KUCUK_2/5/RASCON_37/2*TARRO_2
138	DWAM152	Triticum durum	MÂALI/10/ALTAR 84/CMH82A.1062//ALTAR 84/3/YAZI_10/4/SNITAN/9/USDA595/3/D67.3/RABI//CRA/4/ALO/5/HUI/YAV_1/6/ARDENTE/7/HUI/YAV79/8/POD_9
139	DWAM153	Triticum durum	BELLAROI/4/BCRIS/BICUM//LLARETA INIA/3/DUKEM_12/2*RASCON_21
140	DWAM154	Triticum durum	P91.272.3.1/3*MEXI75//2*JUPARE C 2001/5/CMH79A.1147/HUI//CMH82.801/3/GRVAND_2/MCK_2/4/SOMAT_4/INTER_8/6/1A.1D 5+1-06/3*MOJO//RCOL/4/ARMENT//SRN_3/NIGRIS_4/3/CANELO_9.1
141	DWAM155	Triticum durum	PLATA_6/GREEN_17//SNITAN/4/YAZI_1/AKAKI_4//SOMAT_3/3/AUK/GUIL//GREEN/5/RCOL/GUANAY*2//SOMAT_3/GREEN_22
142	DWAM156	Triticum durum	P91.272.3.1/3*MEXI75//2*JUPARE C 2001/5/ARTICO/AJAIA_3//HUALITA/3/FULVOUS_1/MFOWL_13/4/TECA96/TILO_1/6/RISSA/GAN//POHO_1/3/PLATA_3//CREX/ALLA*2/4/ARMENT//SRN_3/NIGRIS_4/3/CANELO_9.1
143	DWAM157	Triticum durum	BCRIS/BICUM//LLARETA INIA/3/DUKEM_12/2*RASCON_21/5/SRN_2//YAVAUS/HUI/3/RASCON_19/4/SOMAT_3/PHAX_1//TILO_1/LOTUS_4
144	DWAM158	Triticum durum	SOOTY_9/RASCON_37//JUPARE C 2001/3/SOOTY_9/RASCON_37//CAMAYO
145	DWAM159	Triticum durum	SOOTY_9/RASCON_37//GUAYACAN INIA/3/SOOTY_9/RASCON_37//STORLOM
146	DWAM160	Triticum durum	SARAGOYA/4/GRO_2/YUAN_1//ARLIN/2*ACO89/3/JUPARE C 2001/5/SOMAT_4/INTER_8/3/RASCON_21/KNAR_3//PLATA_8/4/CNDO/PRIMADUR//HAI-OU_17/3/SNITAN
