# Supplementary material for: Deciphering Genomic Regions and Putative Candidate Genes for Grain Size and Shape Traits in Durum Wheat through GWAS
Source: Preprints.org preprint supplement (doi:10.20944/preprints202308.1643.v1), 2023-08-23
Supplement: Supplementary file 3 [file Table S2.docx]

Table S2. Pearson’s correlation coefficient of grain size and shape-related traits in the durum panel in two environments and the BLUP data

| **Traits** | | | **E1** | **E2** | **BLUP** |
| --- | --- | --- | --- | --- | --- |
| **AS** | **vs** | **PL** | 0.890*** | 0.940*** | 0.927*** |
| **AS** | **vs** | **L** | 0.783*** | 0.875*** | 0.856*** |
| **AS** | **vs** | **W** | 0.701*** | 0.710*** | 0.614*** |
| **AS** | **vs** | **LWR** | 0.046 | 0.311*** | 0.323*** |
| **AS** | **vs** | **CS** | -0.041 | -0.256** | -0.304*** |
| **AS** | **vs** | **TGW** | 0.656*** | 0.836*** | 0.108 |
| **PL** | **vs** | **L** | 0.975*** | 0.982*** | 0.983*** |
| **PL** | **vs** | **W** | 0.314*** | 0.451*** | 0.288*** |
| **PL** | **vs** | **LWR** | 0.486*** | 0.604*** | 0.647*** |
| **PL** | **vs** | **CS** | -0.487*** | -0.564*** | -0.634*** |
| **PL** | **vs** | **TGW** | 0.507*** | 0.726*** | 0.059 |
| **L** | **vs** | **W** | 0.128 | 0.312*** | 0.141 |
| **L** | **vs** | **LWR** | 0.645*** | 0.721*** | 0.757*** |
| **L** | **vs** | **CS** | -0.636*** | -0.665*** | -0.736*** |
| **L** | **vs** | **TGW** | 0.405*** | 0.644*** | 0.041 |
| **W** | **vs** | **LWR** | -0.670*** | -0.430*** | -0.537*** |
| **W** | **vs** | **CS** | 0.649*** | 0.436*** | 0.520*** |
| **W** | **vs** | **TGW** | 0.592*** | 0.734*** | 0.123 |
| **LWR** | **vs** | **CS** | -0.976*** | -0.949*** | -0.970*** |
| **LWR** | **vs** | **TGW** | -0.154 | 0.067 | -0.047 |
| **CS** | **vs** | **TGW** | 0.150 | -0.064 | 0.059 |

* p < .05, ** p < .01, *** p < .001 AS: Area size, PL: Perimeter length, L: Grain length, W: Grain width, LWR: Length-width ratio, CS: Circularity, TGW: Thousand grain weight
