# Supplementary material for: Deciphering Genomic Regions and Putative Candidate Genes for Grain Size and Shape Traits in Durum Wheat through GWAS
Source: Preprints.org preprint supplement (doi:10.20944/preprints202308.1643.v1), 2023-08-23
Supplement: Supplementary file 5 [file Table S4.xlsx]

## Sheet: Table S3
Table S4. Candidate genes identified for only stable MTAs in the Svevo genome. The genes marked by asterisks have a direct relationship with grain traits in different plants or wheat
MTA	Gene stable ID	Gene start (bp)	Gene end (bp)	Gene description
QAS.su.2A1	TRITD2Av1G047110	103816136	103818263	Origin recognition complex subunit 6
	TRITD2Av1G047140	103896469	103898683	Transcription factor
	TRITD2Av1G047150	103898920	103900605	Pentatricopeptide repeat-containing protein
	*TRITD2Av1G047210	103948645	103949427	UDP-glycosyltransferase
	TRITD2Av1G047230	103998100	104060883	Lipase/lipooxygenase, PLAT/LH2
	*TRITD2Av1G047390	104433296	104434726	Glycosyltransferase
	TRITD2Av1G047460	104507597	104512754	Gtpase obg-like
	TRITD2Av1G047470	104515329	104517588	Sphingoid base hydroxylase 2
	TRITD2Av1G047480	104519957	104520397	SAUR-like auxin-responsive protein family G
	TRITD2Av1G047520	104544353	104544559	Chymotrypsin inhibitor
	TRITD2Av1G047530	104552937	104553140	Chymotrypsin inhibitor
	TRITD2Av1G047540	104562147	104562416	Chymotrypsin inhibitor
	TRITD2Av1G047580	104648329	104652583	Myb-related protein-like
	TRITD2Av1G047600	104655567	104658579	Serine hydroxymethyltransferase G
	TRITD2Av1G047870	105114337	105114729	NADH-quinone oxidoreductase subunit N 1 G
QCS.su.2A1 QLWR.su.2A1	TRITD2Av1G064610	147208617	147212925	Succinate-CoA ligase [ADP-forming] subunit alpha
	TRITD2Av1G064660	147351292	147352570	Cysteine proteinase
	TRITD2Av1G064670	147353009	147355471	Bet1-like protein
	TRITD2Av1G064720	147371561	147375989	Major facilitator superfamily protein
	TRITD2Av1G064770	147530505	147533896	5-formyltetrahydrofolate cyclo-ligase
	*TRITD2Av1G065030	148285931	148287017	BES1/BZR1 homolog 1
	TRITD2Av1G065100	148645240	148645984	Geranylgeranyl pyrophosphate synthase
	TRITD2Av1G065210	149070857	149073540	Transporter-related family protein
QCS.su.7A1	TRITD7Av1G255680	672138951	672140477	Basic-leucine zipper (BZIP) transcription factor family
	TRITD7Av1G255690	672171064	672171399	RNA-binding (RRM/RBD/RNP motifs) family protein G
	TRITD7Av1G255750	672218844	672226996	Receptor protein kinase, putative
	TRITD7Av1G255830	672396684	672697566	Eukaryotic aspartyl protease family protein, putative
	TRITD7Av1G255880	672529311	672530814	Aspartic proteinase nepenthesin-2
	TRITD7Av1G255890	672545927	672546895	Aspartic proteinase nepenthesin-2
	TRITD7Av1G255900	672561919	672562533	Aspartic proteinase nepenthesin-2
	TRITD7Av1G255910	672700967	672765144	Aspartic proteinase nepenthesin-2
	TRITD7Av1G255960	672921328	672927547	ATP synthase subunit beta
	TRITD7Av1G255970	672931382	672935425	Core-2/I-branching beta-1,6-N-acetylglucosaminyltransferase family protein
	TRITD7Av1G256010	672965477	672983242	Photolyase blue-light receptor protein
	TRITD7Av1G256050	672980876	672982135	Photosystem II CP47 reaction center protein G
	TRITD7Av1G256060	673001158	673003654	WAT1-related protein
	TRITD7Av1G256090	673019900	673020133	Unknown
	TRITD7Av1G256110	673032824	673038057	disease resistance family protein / LRR family protein
	TRITD7Av1G256130	673044090	673047353	receptor kinase 1
	TRITD7Av1G256140	673050068	673054173	TBC1 domain family member-like protein
	TRITD7Av1G256150	673056740	673056991	Diphthamide biosynthesis protein 3
	TRITD7Av1G256190	673087226	673088113	Serine/arginine repetitive matrix protein 2, putative isoform 1 G
	TRITD7Av1G256200	673088644	673092275	ENTH/ANTH/VHS superfamily protein G
	*TRITD7Av1G256220	673119977	673122833	B3 domain-containing protein
	TRITD7Av1G256340	673408093	673408509	Histone H2B
	TRITD7Av1G256370	673426892	673427308	Histone H2B
	TRITD7Av1G256390	673502174	673502602	Histone H2B
	TRITD7Av1G256400	673503816	673510686	Receptor-like protein kinase
	TRITD7Av1G256420	673518626	673520270	Ubiquitin-conjugating enzyme E2
	TRITD7Av1G256450	673573889	673577918	Ubiquitin-conjugating enzyme E2
	TRITD7Av1G256460	673583437	673583715	DNA ligase G
	TRITD7Av1G256640	673718145	673718759	Cotton fiber protein
	TRITD7Av1G256680	673807013	673808461	ATP-dependent zinc metalloprotease FtsH
	TRITD7Av1G256730	673873770	673875206	Disease resistance protein RGA2
	TRITD7Av1G256750	673913501	673913869	Unknown
	TRITD7Av1G256860	674089137	674090042	F-box family protein
QL.su.1B1 QPL.su.1B1	*TRITD1Bv1G011760	28778557	28780832	Protoheme IX farnesyltransferase
	TRITD1Bv1G011860	29106115	29110137	Type I inositol-1,4,5-trisphosphate 5-phosphatase 1
	TRITD1Bv1G011910	29162700	29163542	Non-structural polyprotein G
	TRITD1Bv1G011940	29286893	29289639	Transmembrane protein, putative (DUF594)
	TRITD1Bv1G011950	29293303	29295509	Pentatricopeptide repeat-containing family protein
	TRITD1Bv1G011970	29327320	29334635	Armadillo/beta-catenin-like repeat protein
	TRITD1Bv1G011980	29337274	29344512	Transmembrane protein, putative (DUF247)
	TRITD1Bv1G012050	29458761	29459975	2-oxoglutarate and Fe(II)-dependent oxygenase superfamily protein, putative
	TRITD1Bv1G012090	29668065	29669447	3-ketoacyl-CoA synthase
	*TRITD1Bv1G012100	29705090	29707420	Ubiquitin carboxyl-terminal hydrolase 2
	TRITD1Bv1G012150	29871515	29871754	Vps51/Vps67 family (components of vesicular transport) protein G
	*TRITD1Bv1G012160	29874848	29875394	Histone deacetylase 2 G
	TRITD1Bv1G012170	29876561	29876870	Ycf68
	TRITD1Bv1G012190	29882745	29882984	Serine hydroxymethyltransferase 1 G
	*TRITD1Bv1G012200	29884927	29885280	Histone deacetylase 2 G
	TRITD1Bv1G012240	29910386	29910821	Ycf68
	TRITD1Bv1G012270	29915769	29915963	Major facilitator superfamily protein G
	TRITD1Bv1G012280	29916898	29917332	Ycf68
	*TRITD1Bv1G012290	29918548	29918919	Histone deacetylase 2 G
	TRITD1Bv1G012310	29924408	29925937	Photosystem II CP47 reaction center protein
	TRITD1Bv1G012320	29926432	29927237	ATP-dependent Clp protease proteolytic subunit
	TRITD1Bv1G012330	29928031	29928390	50S ribosomal protein L20
	TRITD1Bv1G012350	29929067	29930072	DNA-directed RNA polymerase subunit alpha
	TRITD1Bv1G012360	29934342	29934908	Zinc finger family protein
	TRITD1Bv1G012370	29955538	29956107	Zinc finger family protein
	TRITD1Bv1G012380	30056185	30056751	Zinc finger family protein
QLWR.su.2A2 QCS.su.2A2	TRITD2Av1G180750	504981233	504982455	HVA22-like protein
	TRITD2Av1G180800	505031723	505032226	OJ991214_12.8 protein G
	TRITD2Av1G180840	505107822	505108349	Copper transporter family protein
	TRITD2Av1G180880	505123407	505123850	Protease inhibitor/seed storage/lipid transfer family protein
	TRITD2Av1G180900	505160253	505160522	Pre-mRNA-processing factor 19 G
	TRITD2Av1G180910	505161119	505161618	Protease inhibitor/seed storage/lipid transfer family protein
	TRITD2Av1G180920	505162069	505163100	FAM210B-like protein
	*TRITD2Av1G180930	505163820	505168048	Transcription factor
	TRITD2Av1G181100	505537358	505540099	Peroxiredoxin
	TRITD2Av1G181160	505581267	505584346	Chaperone protein clpB
	*TRITD2Av1G181270	505956404	505957413	Late embryogenesis abundant (LEA) hydroxyproline-rich glycoprotein family
	TRITD2Av1G181430	506259374	506263343	Digalactosyldiacylglycerol synthase 1, chloroplastic
	TRITD2Av1G181450	506277721	506280342	Aluminum-activated malate transporter
	TRITD2Av1G181560	506547367	506547676	Isopentenyl-diphosphate Delta-isomerase
QTGW.su.2A2	TRITD2Av1G048150	105825619	105830304	4-alpha-glucanotransferase
	*TRITD2Av1G048230	106205594	106206602	Cytochrome P450
	TRITD2Av1G048250	106243424	106244848	Phytoene desaturase
	*TRITD2Av1G048320	106340477	106344484	Patatin
	TRITD2Av1G048350	106402032	106407770	Histone acetyltransferase
	*TRITD2Av1G048480	107026668	107032955	B3 domain-containing protein G
QTGW.su.2A3	*TRITD2Av1G191770	532722987	532723607	Phospholipase C 2 G
	TRITD2Av1G191840	532836078	532838154	LURP-one-like protein
	*TRITD2Av1G191850	532838099	532841739	Pentatricopeptide repeat-containing protein
	TRITD2Av1G191990	533138528	533140747	OBP3-RESPONSIVE GENE 4 family protein G
	TRITD2Av1G192000	533141430	533143832	Signal peptidase subunit-25
	TRITD2Av1G192060	533234853	533240741	Major facilitator superfamily transporter
QTGW.su.7B1	TRITD7Bv1G159330	501077872	501078774	F-box domain containing protein
	TRITD7Bv1G158910	500328019	500329704	F-box family protein
	TRITD7Bv1G158990	500454962	500458257	F-box family protein
	*TRITD7Bv1G159220	500914944	500920059	Elongation factor like protein
	TRITD7Bv1G159120	500606654	500609121	Nucleoside diphosphate kinase
	*TRITD7Bv1G159310	501013722	501029428	ABC transporter B family protein
	TRITD7Bv1G159240	500923371	500932000	110 kDa U5 small nuclear ribonucleoprotein component CLO G
	TRITD7Bv1G158960	500367584	500369287	Ribosomal RNA apurinic site specific lyase-like
	TRITD7Bv1G159090	500568418	500568663	Cytochrome c oxidase subunit 2
	TRITD7Bv1G159280	500933906	500936238	Alcohol dehydrogenase, putative
